# Supplementary material for: p21WAF1 expression induced by MEK/ERK pathway activation or inhibition correlates with growth arrest, myogenic differentiation and onco-phenotype reversal in rhabdomyosarcoma cells
Source: PubMed Central journal article supplement (PMC1343585; doi:10.1186/1476-4598-4-41), 2005-12-13
Supplement: 1476-4598-4-41-S1.pdf [file 1476-4598-4-41-S1.pdf]

C

TPA

U

U+TPA

3h

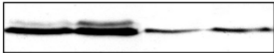

12h

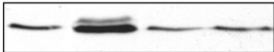

2d

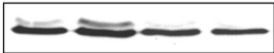

4d

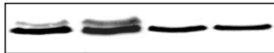

ERK-PO<sub>4</sub>
