# Supplementary material for: p21WAF1 expression induced by MEK/ERK pathway activation or inhibition correlates with growth arrest, myogenic differentiation and onco-phenotype reversal in rhabdomyosarcoma cells
Source: PubMed Central journal article supplement (PMC1343585; doi:10.1186/1476-4598-4-41), 2005-12-13

**A**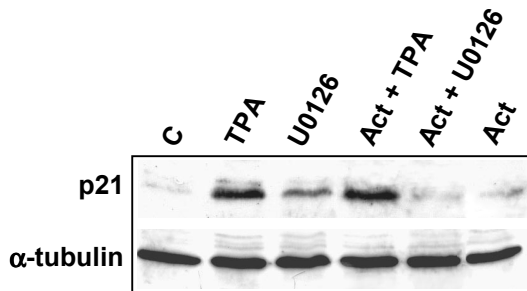**B**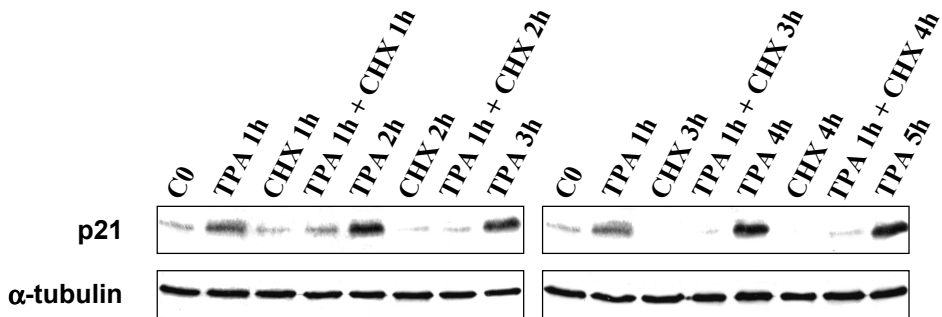

Supplement: 1476-4598-4-41-S3.pdf [file 1476-4598-4-41-S3.pdf]
